# Supplementary material for: Comparing the Nutritional Impact of Dietary Strategies to Reduce Discretionary Choice Intake in the Australian Adult Population: A Simulation Modelling Study
Source: MDPI journal article supplement (doi:10.3390/nu9050442), 2017-05-03
Supplement: s1 [file s1]

Supplementary Table S1: Moderation scenarios energy compensation ratios and substitution scenarios replacement ratios

| Moderation energy compensation | | | |
| --- | --- | --- | --- |
| Scenario | Discretionary foods contribution | Core foods contribution | Energy compensation |
| Reduce discretionary foods by 50% with 25% energy compensation from all choices based on current intake distribution. | Energy from discretionary foods 2173.5kJ divided by energy from all foods 7593.5kJ = 0.2862 (28.6%) | Energy from core foods 5420.0kJ divided by energy from all foods 7593.5kJ = 0.7137 (71.4%) | 25% of energy deficit (1087.02kJ) = 271.76kJ of which 77.72kJ from discretionary foods and 194.03kJ from core foods |
| Reduce discretionary foods by 50% with 75% energy compensation from all choices based on current intake distribution. | As above | As above | 75% of energy deficit (1087.02kJ) = 815.27kJ of which 233.17kJ from discretionary foods and 582.10kJ from core foods |
| Substitution replacement | | | |
| Scenario | Discretionary choices to be substituted1 | Replacement core choices2 | Replacement ratio3 |
| *Discretionary foods* |  |  |  |
| Replace 50% of grams of discretionary foods (89.4g) with 127.9g of fresh/frozen/canned fruit and vegetables (excludes dried fruit, potatoes and legumes) matching using replacement ratio of 1.431. | Sweet and savoury buns, high-sugar ready-to-eat breakfast cereals, biscuits (cookies), cakes and muffins, crackers, sweet/savour pastries, commercial fried food and takeaway (pizza, hamburger), butter and other solid fats, sausages, processed meats, cream, ice cream, dry soup mix, sauces, hot fried potato, potato crisps, savoury snacks, sugar, jams and honey, desserts, confectionary, fruit and muesli bars, vegemite, stock, salt | Pome fruit, berry fruit, citrus fruit, stone fruit, tropical and subtropical fruit), other fruit, mixtures of fruit or mixed dishes where fruit is the major component  Cabbage, cauliflower and similar brassica vegetables, carrot and similar root vegetables, leaf and stalk vegetables, peas and beans, tomato and tomato products, other fruiting vegetables, other vegetables and vegetable combinations, dishes where vegetable is the major component | Population discretionary median intake = 0.0568  Population core median intake = 0.0813  1.431 |
| Replace 50% of all discretionary foods (89.4g) with 136.4g of all core foods (i.e. fruit and vegetables (including potatoes, legumes, dried fruit), breads and cereals, dairy (including milk), meat and alternatives, core fats and oils, and core sauces, soups, condiments) matching using replacement ratio of 1.526. | As above | As above with the addition of the following:  Dried fruit, preserved fruit  Mature legumes and pulses, mature legume and pulse products and dishes, potatoes  Milk, yoghurt, cheese and/or their alternatives (soy, rice, oat, almond), custard, flavoured milks, milkshakes, smoothies  Grains and flours (e.g. oats, rice, quinoa, wheat flour), breads, flat breads, sweet and savoury buns, pasta and noodles, breakfast cereals, porridge, savoury biscuits, scones, mixed dishes where cereal is the main ingredient, crumpets and pancakes, air popcorn  Fish and seafood (e.g. fresh, canned, mixed dishes), eggs, lean meats (e.g. beef, pork, lamb, kangaroo), poultry, organ meats, lean sausages, mixed meat or poultry dishes, meat alternatives (e.g. tofu), nuts and seeds  Margarine, table spreads, plant oils  Soups, homemade sauces, vinegar, yeast powder, intense sweeteners, herbs, spices, vanilla essence, gelatine | Population discretionary median intake = 0.0568  Population core median intake = 0.0867  1.526 |
| *Discretionary beverages* |  |  |  |
| Replace 50% of discretionary beverages (121.2g) with 104.5g of water or fruit and vegetable juices matching using replacement ratio of 0.862. | Fruit drinks, cordials, soft drinks (including sugar sweetened and artificially sweetened), flavoured mineral waters, sports drinks, energy drinks, sweetened water | Fruit and vegetable juice, water | Population discretionary median intake = 0.5881  Population core median intake = 0.5070  10.862 |
| Replace 50% of discretionary beverages (121.2g) with 121.2g of water matching using replacement ratio of 1.000. | As above | Water | Population discretionary median intake =0.5881  Population core median intake = 42.3317  071.980 unfeasible ratio4: replaced by ratio of 1.000 |
| Replace 50% of alcoholic beverages (130.4g) with 130.1g of water or fruit and vegetable juices matching using replacement ratio of 0.997. | Beer, wine, port, sherry, spirits, cider, mixed drinks and liqueur | Fruit and vegetable juice, water | Population discretionary median intake = 0.5083  Population core median intake = 0.5070  10.997 |
| Replace 50% of “other” types of discretionary beverages (5.2g) with 5.5g of a healthier substitute (e.g. core variety tea/coffee) matching using replacement ratio of 1.051. | Chai latte, sweetened coffee, beverage base concentrate (e.g. chocolate, milo) | Black and herbal teas, coffee, reconstituted beverage base with water/milk, breakfast cereal beverage | Population discretionary median intake = 0.4238  Population core median intake = 0.4454  1.051 |

1 Discretionary foods and beverages include only the items flagged as discretionary by the Australian Bureau of Statistics discretionary flag code [2]

2 Core choices include only items not flagged as discretionary by the Australian Bureau of Statistics discretionary flag code [2]

3 Replacement ratio was calculated by the population replacement median gram intake divided by the population discretionary median gram intake

**4 Due to the limited codes for plain water compared with other beverage codes and the aggregated population median intake of water, the replacement ratio of 71.980 was deemed unfeasible, therefore a replacement ratio of 1.00 was used which is consistent with the ratio of all discretionary beverages to all core beverages**

**Supplementary Table S3:** Modelled intakes simulating the impact on population mean nutrient profile of dietary strategies to reduce discretionary choices in Australian adults

|  | **Moderation** | | **Substitution** | | | | **Reformulation** | |
| --- | --- | --- | --- | --- | --- | --- | --- | --- |
|  | **Reduction in discretionary choices1** | | **Replacement of discretionary choices with core foods2** | | **Replacement of discretionary choices with fruit and vegetables3** | | **Reformulate discretionary choices4** | |
|  | **Modelled intake5** | **% change in total intake6** | **Modelled intake** | **% change in total intake** | **Modelled intake** | **% change in total intake** | **Modelled intake** | **% change in total intake** |
| Grams (g) | 2991.5 | -10.4 | 3367.9 | 0.9 | 3359.4 | 0.6 | 3323.0 | -0.4 |
| Energy (kJ) | 7189.0 | -17.3 | 7934.8 | -8.8 | 7518.1 | -13.6 | 8408.0 | -3.3 |
| Protein (g) (%E7) | 83.8 (19.5) | -7.9 | 93.7 (19.8) | 3.0 | 86.1 (19.2) | -5.4 | 91.0 (18.1) | 0.0 |
| Total fat (g) (%E) | 60.6 (31.7) | -17.9 | 66.8 (31.7) | -9.4 | 62.4 (31.3) | -15.4 | 73.8 (33.1) | 0.0 |
| Saturated fat (g) (%E) | 21.9 (11.5) | -20.9 | 24.0 (11.4) | -13.4 | 22.3 (11.2) | -19.4 | 22.0 (9.9) | -20.6 |
| Carbohydrate (g) (%E) | 183.9 (43.3) | -17.7 | 205.3 (43.3) | -9.1 | 197.6 (44.0) | -12.5 | 225.9 (45.0) | 0.0 |
| Total sugars (g) (%E) | 77.3 (18.0) | -24.9 | 84.0 (17.7) | -18.4 | 86.7 (19.3) | -15.7 | 91.9 (18.3) | -10.6 |
| Added sugars (g) (%E) | 28.7 (6.7) | -43.3 | 29.5 (6.2) | -41.7 | 29.0 (6.5) | -42.7 | 39.7 (7.9) | -21.7 |
| Sodium (mg) | 2001.3 | -17.7 | 2210.6 | -9.0 | 2050.4 | -15.6 | 2270.4 | -6.6 |
| Alcohol (g) (%E) | 7.2 (2.9) | -50.0 | 7.2 (2.7) | -50.0 | 7.2 (2.8) | -50.0 | 10.8 (3.8) | -25.0 |
| Fiber (g) | 21.4 | -6.6 | 24.1 | 5.0 | 24.7 | 7.7 | 22.9 | 0.0 |
| Vitamin A retinol equivalents (µg) | 794.2 | -6.8 | 891.3 | 4.6 | 964.4 | 13.2 | 851.8 | 0.0 |
| Thiamine (vitamin B1) (mg) | 1.3 | -10.8 | 1.5 | -0.4 | 1.4 | -7.0 | 1.5 | 0.0 |
| Riboflavin (vitamin B2) (mg) | 1.7 | -10.0 | 1.9 | -0.6 | 1.8 | -6.7 | 1.9 | 0.4 |
| Niacin equivalents (mg) | 37.6 | -9.3 | 41.8 | 0.9 | 38.8 | -6.4 | 41.4 | 0.0 |
| Dietary folate equivalent (µg) | 592.8 | -5.9 | 624.3 | 5.0 | 629.9 | 6.9 | 609.9 | 0.0 |
| Vitamin B6 (pyridoxine) (mg) | 1.3 | -12.7 | 1.5 | -3.0 | 1.4 | -5.4 | 1.5 | 0.0 |
| Vitamin B12 (cobalamin) (µg) | 4.1 | -7.8 | 4.6 | 2.7 | 4.2 | -7.2 | 4.5 | -0.4 |
| Vitamin C (mg) | 94.3 | -7.8 | 107.3 | 4.9 | 121.1 | 18.4 | 102.3 | 0.0 |
| Vitamin E (mg) | 9.2 | -12.7 | 10.2 | -2.8 | 9.9 | -6.1 | 10.5 | 0.0 |
| Calcium (mg) | 745.3 | -7.4 | 829.8 | 3.1 | 778.0 | -3.3 | 804.6 | 0.0 |
| Iodine (µg) | 160.1 | -7.1 | 178.6 | 3.6 | 163.5 | -5.1 | 172.3 | 0.0 |
| Iron (mg) | 10.0 | -9.5 | 11.2 | 1.1 | 10.7 | -4.0 | 11.1 | 0.0 |
| Magnesium (mg) | 307.7 | -9.2 | 342.6 | 1.2 | 330.2 | -2.5 | 338.7 | 0.0 |
| Phosphorous (mg) | 1307.7 | -10.9 | 1454.1 | -0.9 | 1353.4 | -7.7 | 1466.9 | 0.0 |
| Potassium (mg) | 2635.2 | -9.5 | 2933.3 | 0.7 | 2920.6 | 0.3 | 2912.5 | 0.0 |
| Selenium (µg) | 83.3 | -8.5 | 93.4 | 2.6 | 85.7 | -5.8 | 91.0 | 0.0 |
| Zinc (mg) | 10.2 | -7.7 | 11.4 | 3.4 | 10.6 | -4.1 | 11.0 | -0.4 |

1 Reduction of discretionary choices by 50% with no energy compensation

2 Replacement of 50% of discretionary foods with core foods and 50% of discretionary beverages with water, fruit and vegetable juices based on replacement ratio

3 Replacement 50% of discretionary foods with fruit and vegetables and 50% of discretionary beverages with water, fruit and vegetable juices based on replacement ratio

4 Reformulation by replacing 50% of saturated fat with unsaturated fat, reduce sugar by 25% and sodium by 20% in discretionary foods, and reduce sugar by 25% and alcohol by 25% in discretionary water-based and alcoholic beverages, and reduce sugar by 25% and sodium by 20% in “other” discretionary beverages

5 Absolute values of modelled dietary intake of total core and discretionary food and beverages

6 Percent change of total core and discretionary foods and beverages

7 Modelled nutrient percentage of total energy intake

**Supplementary Table S6:** Sensitivity analyses testing the impact of substituting water-based discretionary beverages to core beverages on population mean nutrient profile

|  | **Replace 50% of water-based discretionary beverages with water, or fruit and vegetable juices** | | **Replace 50% of water-based discretionary beverages with water** | |
| --- | --- | --- | --- | --- |
|  | **Modelled dietary profile** | **Percent change in total intake1** | **Modelled dietary profile** | **Percent change in total intake** |
| Grams (g) | 3320.9 | -0.5 | 3337.7 | 0.0 |
| Energy (kJ) | 8557.5 | -1.6 | 8551.3 | -1.7 |
| Protein (g) (%E2) | 91.0 (17.8) | 0.0 | 91.0 (17.8) | 0.0 |
| Total fat (g) (%E) | 73.8 (32.5) | 0.0 | 73.8 (32.5) | 0.0 |
| Saturated fat (g) (%E) | 27.7 (12.2) | 0.0 | 27.7 (12.2) | 0.0 |
| Carbohydrate (g) (%E) | 217.5 (42.5) | -3.7 | 217.2 (42.5) | -3.9 |
| Total sugars (g) (%E) | 94.5 (18.5) | -8.1 | 94.2 (18.4) | -8.5 |
| Added sugars (g) (%E) | 42.3 (8.3) | -16.4 | 42.3 (8.3) | -16.4 |
| Sodium (mg) | 2417.3 | -0.5 | 2417.3 | -0.5 |
| Alcohol (g) (%E) | 14.4 (4.9) | 0.0 | 14.4 (4.9) | 0.0 |
| Fiber (g) | 22.9 | 0.1 | 22.9 | -0.1 |
| Vitamin A retinol equivalents (µg) | 851.8 | 0.0 | 850.2 | -0.2 |
| Thiamine (vitamin B1) (mg) | 1.5 | 0.1 | 1.5 | 0.0 |
| Riboflavin (vitamin B2) (mg) | 1.9 | -0.8 | 1.9 | -0.9 |
| Niacin equivalents (mg) | 41.1 | -0.6 | 41.1 | -0.7 |
| Dietary folate equivalent (µg) | 287.6 | 0.0 | 286.1 | -0.6 |
| Vitamin B6 (pyridoxine) (mg) | 1.4 | -3.9 | 1.4 | -4.0 |
| Vitamin B12 (cobalamin) (µg) | 4.5 | -1.0 | 4.5 | -1.0 |
| Vitamin C (mg) | 100.5 | -1.7 | 98.6 | -3.6 |
| Vitamin E (mg) | 10.5 | -0.2 | 10.5 | -0.2 |
| Calcium (mg) | 803.5 | -0.1 | 803.4 | -0.2 |
| Iodine (µg) | 170.7 | -1.0 | 170.7 | -0.9 |
| Iron (mg) | 11.1 | -0.2 | 11.1 | -0.2 |
| Magnesium (mg) | 338.9 | 0.1 | 338.9 | 0.1 |
| Phosphorous (mg) | 1457.5 | -0.6 | 1456.9 | -0.7 |
| Potassium (mg) | 2903.9 | -0.3 | 2897.2 | -0.5 |
| Selenium (µg) | 90.8 | -0.2 | 90.9 | -0.2 |
| Zinc (mg) | 11.0 | -0.1 | 11.0 | -0.1 |

1 Percent change of total core and discretionary foods and beverages

2 Modelled nutrient percentage of total energy intake
